# Supplementary material
Source: publisher site journal article supplement (https://www.dovepress.com/article/308922)
Supplement: Supplementary file 1 [file get_supplementary_file.php]

**Table S1.** Baseline characteristics of the 3,252 analysis subjects compared with the subjects of the IPAG questionnaire.

| **Characteristics** | **Variables** | **IPAG Questionnaire subjects (n = 818)** | **Analysis subjects (n = 3,252)** |
| --- | --- | --- | --- |
| Demographics | mean age | 58.2 | 64.1 |
|  | age categories 　　 　 < 40, % | 0.0 | 0.0 |
|  | 40-49, % | 26.0 | 8.1 |
|  | 50-59, % | 31.2 | 20.9 |
|  | 60-69, % | 24.2 | 42.5 |
|  | > 70, % | 18.6 | 28.6 |
|  | male, % | 49.3 | 95.9 |
| Smoking | smokers, % | 100.0 | 100.0 |
|  | never smoked, % | 0.0 | 0.0 |
|  | mean pack-year | 25.6 | 43.3 |
|  | pack-year categories 0-14, % | 34.8 | 0.0 |
|  | 15-24, % | 20.2 | 6.2 |
|  | 25-49, % | 33.0 | 68.1 |
|  | > 50, % | 12.0 | 25.7 |

**Abbreviations:** IPAG, International Primary Care Airways Group.

**Table S2.** COPD predicted value calculated using the logistic regression model obtained in this study. It is assumed that responses only to the question "Do you often develop cough?" is “yes”.

| **COPD　　　　predicted value (%)** | | **pack-year** | | | | | | | | |
| --- | --- | --- | --- | --- | --- | --- | --- | --- | --- | --- |
| **30** | **40** | **50** | **60** | **70** | **80** | **90** | **100** |
| **age** | **40** | **3.9** | **4.6** | **5.5** | **6.6** | **7.8** | **9.3** | **10.9** | **12.9** |
| **50** | **4.9** | **5.8** | **6.9** | **8.2** | **9.7** | **11.5** | **13.5** | **15.8** |
| **60** | **6.1** | **7.3** | **8.6** | **10.2** | **12.0** | **14.1** | **16.5** | **19.2** |
| **70** | **7.7** | **9.1** | **10.7** | **12.6** | **14.8** | **17.3** | **20.1** | **23.2** |
| **80** | **9.5** | **11.2** | **13.2** | **15.5** | **18.0** | **20.9** | **24.1** | **27.7** |
| **90** | **11.8** | **13.8** | **16.2** | **18.8** | **21.8** | **25.1** | **28.8** | **32.7** |

**Abbreviations:** COPD, chronic obstructive pulmonary disease.

**Table S3.** COPD predicted value calculated using the logistic regression model obtained in this study. It is assumed that responses only to the question "Do you often produce sputum?" is “yes”.

| **COPD　　　　predicted value (%)** | | **pack-year** | | | | | | | | |
| --- | --- | --- | --- | --- | --- | --- | --- | --- | --- | --- |
| **30** | **40** | **50** | **60** | **70** | **80** | **90** | **100** |
| **age** | **40** | **4.1** | **4.9** | **5.9** | **7.0** | **8.3** | **9.8** | **11.5** | **13.5** |
| **50** | **5.2** | **6.2** | **7.3** | **8.7** | **10.2** | **12.1** | **14.2** | **16.6** |
| **60** | **6.5** | **7.7** | **9.1** | **10.8** | **12.7** | **14.8** | **17.3** | **20.1** |
| **70** | **8.1** | **9.6** | **11.3** | **13.3** | **15.5** | **18.1** | **21.0** | **24.2** |
| **80** | **10.0** | **11.8** | **13.9** | **16.3** | **18.9** | **21.9** | **25.2** | **28.9** |
| **90** | **12.4** | **14.5** | **17.0** | **19.8** | **22.9** | **26.3** | **30.0** | **34.0** |

**Abbreviations:** COPD, chronic obstructive pulmonary disease.

**Table S4.** COPD predicted value calculated using the logistic regression model obtained in this study. It is assumed that responses only to the questions “Do you often produce sputum?” and "Do you often develop cough?" are “yes”.

| **COPD　　　　predicted value (%)** | | **pack-year** | | | | | | | | |
| --- | --- | --- | --- | --- | --- | --- | --- | --- | --- | --- |
| **30** | **40** | **50** | **60** | **70** | **80** | **90** | **100** |
| **age** | **40** | **7.4** | **8.8** | **10.4** | **12.2** | **14.4** | **16.8** | **19.5** | **22.6** |
| **50** | **9.2** | **10.9** | **12.8** | **15.0** | **17.5** | **20.4** | **23.5** | **27.0** |
| **60** | **11.4** | **13.4** | **15.7** | **18.3** | **21.3** | **24.5** | **28.1** | **32.0** |
| **70** | **14.1** | **16.5** | **19.2** | **22.2** | **25.5** | **29.2** | **33.1** | **37.4** |
| **80** | **17.2** | **20.0** | **23.1** | **26.6** | **30.3** | **34.3** | **38.6** | **43.1** |
| **90** | **20.9** | **24.1** | **27.6** | **31.5** | **35.6** | **39.9** | **44.4** | **49.0** |

**Abbreviations:** COPD, chronic obstructive pulmonary disease.

**Table S5.** COPD predicted value calculated using the logistic regression model obtained in this study. It is assumed that the responses to questions “Do you often have a feeling of dyspnea?” and "Do you often develop cough?" are “yes”.

| **COPD　　　　predicted value (%)** | | **pack-year** | | | | | | | | |
| --- | --- | --- | --- | --- | --- | --- | --- | --- | --- | --- |
| **30** | **40** | **50** | **60** | **70** | **80** | **90** | **100** |
| **age** | **40** | **8.2** | **9.7** | **11.4** | **13.4** | **15.7** | **18.3** | **21.2** | **24.5** |
| **50** | **10.1** | **11.9** | **14.0** | **16.4** | **19.1** | **22.1** | **25.5** | **29.1** |
| **60** | **12.5** | **14.7** | **17.2** | **19.9** | **23.1** | **26.5** | **30.2** | **34.3** |
| **70** | **15.4** | **17.9** | **20.8** | **24.0** | **27.5** | **31.4** | **35.5** | **39.8** |
| **80** | **18.7** | **21.7** | **25.0** | **28.6** | **32.5** | **36.7** | **41.1** | **45.6** |
| **90** | **22.6** | **26.0** | **29.7** | **33.7** | **38.0** | **42.4** | **47.0** | **51.6** |

**Abbreviations:** COPD, chronic obstructive pulmonary disease.

**Table S6.** COPD predicted value calculated using the logistic regression model obtained in this study. It is assumed that responses to the questions “Do you often have a feeling of dyspnea?” and " Do you often produce sputum?" are “yes”.

| **COPD　　　　predicted value (%)** | | **pack-year** | | | | | | | | |
| --- | --- | --- | --- | --- | --- | --- | --- | --- | --- | --- |
| **30** | **40** | **50** | **60** | **70** | **80** | **90** | **100** |
| **age** | **40** | **8.6** | **10.2** | **12.0** | **14.1** | **16.5** | **19.2** | **22.2** | **25.6** |
| **50** | **10.7** | **12.6** | **14.8** | **17.2** | **20.0** | **23.1** | **26.6** | **30.3** |
| **60** | **13.2** | **15.4** | **18.0** | **20.9** | **24.1** | **27.7** | **31.5** | **35.6** |
| **70** | **16.2** | **18.8** | **21.8** | **25.1** | **28.7** | **32.7** | **36.8** | **41.2** |
| **80** | **19.7** | **22.7** | **26.1** | **29.9** | **33.9** | **38.1** | **42.5** | **47.1** |
| **90** | **23.7** | **27.2** | **31.0** | **35.1** | **39.4** | **43.9** | **48.4** | **53.1** |

**Abbreviations:** COPD, chronic obstructive pulmonary disease.

**Table S7.** COPD predicted value calculated using the logistic regression model obtained in this study. It is assumed that responses to the questions "Do you often develop cough?", "Do you often produce sputum?", and "Do you often have a feeling of dyspnea?" are all “no”.

| **COPD　　　　predicted value (%)** | | **pack-year** | | | | | | | | |
| --- | --- | --- | --- | --- | --- | --- | --- | --- | --- | --- |
| **30** | **40** | **50** | **60** | **70** | **80** | **90** | **100** |
| **age** | **40** | **2.1** | **2.6** | **3.1** | **3.6** | **4.4** | **5.2** | **6.2** | **7.3** |
| **50** | **2.7** | **3.2** | **3.8** | **4.6** | **5.5** | **6.5** | **7.7** | **9.1** |
| **60** | **3.4** | **4.0** | **4.8** | **5.7** | **6.8** | **8.1** | **9.6** | **11.3** |
| **70** | **4.3** | **5.1** | **6.0** | **7.2** | **8.5** | **10.1** | **11.9** | **13.9** |
| **80** | **5.3** | **6.4** | **7.5** | **8.9** | **10.6** | **12.4** | **14.6** | **17.0** |
| **90** | **6.7** | **7.9** | **9.4** | **11.1** | **13.0** | **15.3** | **17.8** | **20.7** |

**Abbreviations:** COPD, chronic obstructive pulmonary disease.
